# Supplementary material for: Overexpression of TaJAZ1 increases powdery mildew resistance through promoting reactive oxygen species accumulation in bread wheat
Source: PubMed Central journal article supplement (PMC6451029; doi:10.1038/s41598-019-42177-y), 2019-04-05
Supplement: 41598_2019_42177_MOESM1_ESM.pdf [file 41598_2019_42177_MOESM1_ESM.pdf]

# Supplemental Figure 2

## *TaMYC4-1B*

5'-  
ATGAACCTGTGGACGGACGACAACGCCTCCATGATGGAGGCCCTTCATGGCCTCCGCCGAC  
ATGCCGGCCTTCCCCTGGGGCGCTGCGGCCACCCCGCCGCCGCCGCCGCGCCGTGCCGC  
AGCAGCCGGCCTTCAACCAGGACACGCTGCAGCAGCGCCTGCAGGCCATCATCGAGGGC  
TCCAGGGAGACCTGGACCTACGCCATCTTCTGGCAGTCCTCCACCGACGCCGGCGCCTC  
GCTCCTCGGCTGGGGCGACGGCTACTACAAGGGCTGCGACGACGCCGACAAGCGCCGC  
CAGCAGCCCACCCCGGCCTCCGCCGCCGAGCAGGAGCACCAGCAAGCGCGTCTCCGGG  
AGCTCAACTCGCTCATAGCCGGGGGAGGCGCCGCCGCCGCCGACGAGGCCGTGAGGA  
GGAGGTCACGGACACCGAGTGGTTCTTCTCGTCTCCATGACCCAGTCCTTCCCCAACGG  
GATGGGCTTGCCGGGCCAGGCGCTCTTCGCCGGCCAGGCCACCTGGATCGCCACGGGG  
CTCGCCAGCGCGCCCTGCGAGCGGGCCAGGCAGGCCTACACCTTCGGCCTCCGCACCAT  
GGTCTGCATCCCCCTCGGCACCGCGTGCTCGAGCTCGGCGCCACCGAGGTCATCTTCC  
AGACCAACGATAGCTTGGGGAGGATCCGCTCGCTCTTCAACCTCAACGGCGGAGGAGGG  
GGCTCTGGATCCTGGCCGCCATCGCGCCGCCGCCGCCGAGGAGCGGAGACGGATCCGT  
CCGTGCTCTGGCTCGCCGACGCGCCGGCCGGGGACATGAAGGAGTCGCCGCCGTCCGT  
CGAGATCTCCGTCTCAAACCGCCGCCACAACCGCCGCAGATCCATCACTTCGAGAA  
CGGGAGCACCAGCAGCTCACGGAGAACCCAGTCTCTCCGTGCACGCGCAGCAGCCTC  
CGCCCAGCAGGCGGCTGCGGCGGCGCAGAGGCAGAACCAGCACCAGCAGCAGCTCCA  
GCATCAGCACCAGCTCCAGCTCCAGCACCAGCACAACCAGGGTCTTTCCGCCGGGAGC  
TCAATTTCTCAGATTTTCGCGTCCAACGCATCCGTACGGTGACCCCGCCTTTCTTCAAGCC  
CGAGTCTGGTGAGATCCTAAACTTTGGCGCTGACAGCACCAGCCGGAGGAACCCTTCGCC  
GGCGCCCCCGCCGCGACGGCCAGCCTCACCACCGCGCCCGGGAGCCTATTCTCCAG  
CACACGGCGACTGTGACGGCCCCGTCAAACGACGCCAAGAACAACCCGAAGCGGTCCAT  
GGAGGCCACCTCCCGCGCGAGCAACACCAACCACCACCAGAACGCCACAGCCAACGAGG  
GGATGCTGTCTTCTCGTTCGGCGCCGACGACGCGGCCGTCCACCGGCACGGGCGCGCC  
AGCCAAGTCGGAGTCCGACCACTCCGACCTGGAGGCGTCCGTCCGCGAGGTGGAGAGCA  
GCCGCGTGGTGCCTCCGCCGGAGGAGAAGCGGCCGCGCAAGCGCGGGCGCAAGCCGG  
CGAACGGGCGCGAGGAGCCCCTGAACCACGTGGAGGCGGAGCGGCAGCGGCGGGAGA  
AGCTGAACCAGCGGTTCTACGCCCTCCGCGCCGTGGTGCCCAACGTGTCCAAGATGGAC  
AAGGCCTCGCTGCTGGGCGACGCCATCTCCTACATCAACGAGCTCCGCGGCAAGATGAC  
GGCGCTGGAGTCGGACAAGGAGACGCTCCACTCCCAAATCGAGGCGCTCAAGAAGGAGC  
GCGACGCCCGGCCGGCCGCGCCGTTCGTCGGGGATGCACGACAACGGGGCGCGGTGCC  
ACGCGGTCGAGATCGAGGCCAAGATCCTGGGGCTGGAGGCGATGATCCGCGTGCAGTGC  
CACAAGCGCAACCACCCGGCGGCGAAGCTGATGACGGCGCTGCGGGAGCTGGACCTGG  
ACGTGTACCACGCCAGCGTGTCCGTGGTGAAGGACATCATGATCCAGCAGGTGGCGGTG  
AAGATGGCCACCCGGGTCTACTCCAGGACCAGCTCAACGCGGCGCTCTACGGCCGCCT  
CGCCGAGCCGGGCACCGCGATGCAAATCCGGTAA-3'

**Supplemental Figure 2. The coding sequence of *TaMYC4* from bread wheat cultivar KN199.**  
The full length CDS of *TaMYC4* derived from the B subgenome is shown.

# Supplemental Figure 3

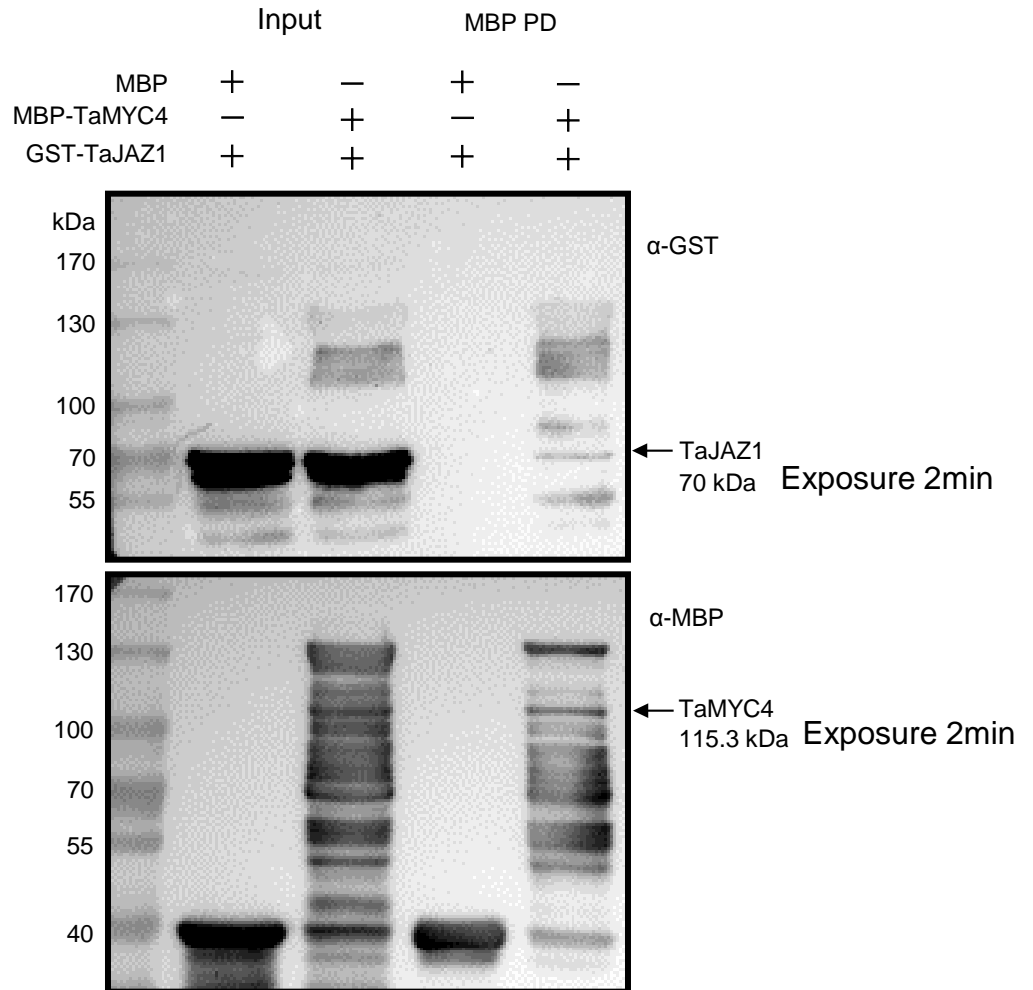

**Supplemental Figure 3. Pull-down assay showing the interaction between TaJAZ1 and TaMYC4.** GST-TaJAZ1 protein was pulled down by MBP-TaMYC4 protein, and detected using an anti-GST antibody. MBP and MBP-TaMYC4 were detected using anti-MBP antibody. Arrow indicates specific band.

# Supplemental Figure 4

## *TaJAZ1-5A-promoter*

5'-

TACGCTAAATGCTAAGCCGCTATCATCACGCCCTAATGCAACCGGGCGTCGCCACGTAGGGA  
GACAAACCTGCATCATGTACAGTAATTAAGTACTGCTCCACTACGCAACCGATGAGCACCTTG  
TTAAAGTAATCAACAGGGTTCGATCAGCATGCTAACTGCTCCTCCTCCTAGTAGAGTGGCGTGG  
AGTATACTATTGCTAATACTGCTAGCCGGTAGCTCCACATGGCCTGTACCTTATCTCCCTAGAT  
TAACATTTAACAAAGTACTACTACTACTTAATCGTGGGATGCAGACGGGAATCTTGCACAG  
TGTCTCGGACAAGTTTGACAAGACTCTGCTTGTATCACTAAATGATGTTATGGAAAGTACTCCA  
TCTAGTCATCGTTTTACTTTTTCATGGGTGCCAGTACAGTAGAGTATAGTCCATCACATAAAAAC  
TTGGGAGATAAACAAAGCTATCTCAGTGTACCAAGTGATGCTACGAGTACCGTAGGAATTGAC  
AAGAAGACGTGTTTGAATAGGAAACCATAATTTTCGGGGCAAAAAGAGTTAACACACCATGATT  
TGGTACTACTACCAGTAGTACTCCTATCCAATAGGTCACGGTCCGTGGTTCATGTTGATTTGAT  
ATTTACTCCAAAGTGGACCATACAAAAAACTCTCATTTTAAAGCCGACATACAAAAGCTGTAAA  
TTTGATCAAAAAGAGCACCTGAATGTTGCGTCGATAGATTCCTAAAAAATGCTACTCCACGAAG  
AACAAATTCATTTGAAAATCCACGAAAGGCCCTCGAACTCGCCTCGAAAGGCCACGCACGGC  
CGTCTCCTTTCCGAAAAGGCAACGTCACCATCTCTCTAATCTACTACCGAACCTATAAAACTT  
CGCTAAACAAATCCCGCAGCCTAAGCAAGGAATAGTACGTACAAGTCCAGCAGATGACCACAT  
TAGCTCAAAAAGAAAAGCAGATGACCACATAGAGAAGAAAAACAACATGGCGCGCACATGG  
CACATGGTCATGGCCACAAGACATAAACAAAACCGGCGAAGCACGCCAGCCCCCACCAC  
CCCAACCCCAACCCCGTGGACGCAAATTTTTTAATCATCAGAAGACACAAAAAAAGGAACA  
TCACGGGATTAGTATTATTATTCTACCCATAAATCCAAAAGTCTACTGTAAGCTCGGGCGCCG  
GGCCCCCGCGACGCGCAGCACGTGGTCTTCCCCCGGACCCACGCGCAGGGAATCCCGC  
GGGCCACAGCGTCAGCGACGGCCCGCTCCCCACCTGGTAATTCGGCTCGTGTGACCCAGC  
CGGGGCTGCACGTGTGCCACTGCAGCCGCGCCAGGGCCCTGTGCGCGGCTACCCGCA  
CCGGGCGGCACTCACCGACGCGCGGGGCGAGGGTCTGGGGTTTGACCCGGCTGTCAGTGGC  
AGTGGGCGGCGTGGGAGCCTCGCGAGGCGGGATGCGCTCGTGCCCGACCACGTGGGCGC  
GACCGGGCTGGGCCAGCGCGAGAGGAGAGGGCGCCCCGATCCGCTCACCGCGGTGGCCC  
ACCGCCGTGCTCGCCACACCTTTCCTCTCGGTTGATTATCACTCGGTTTTGCTTGTTTATTTAT  
CTATAGTTTGTATTTATTTAATTAATCAATCATCTGCCACCCGATCTAACCGCCTGGGCCGA  
AAATAAATAAGCGATTAGCGGCACCACAAGCGCACGCACACCCGCTAGAGGCCATGCTTGGC  
TAGGAGGAGTACTGGAGCAGTATACATACGAGAGAGAGAGAGGCAGGAAGGGAAAGGCAGA  
GCGGTCAAGGCTGGGAGAGGGAGAGGGAGAGCATCGTGTGTCATCATTGCTCGTTTAC  
AGAGGAGTGAGAGAGTCAGAGGAGGAAGGAAGGTTTCAGGGGAGTGAGAGACGAAATTTCC-3'

**Supplemental Figure 4. Promoter sequence of *TaJAZ1* from bread wheat cultivar KN199.**

# Supplemental Figure 5

## *TaNINJA-1A*

5'-

ATGGAGGATGGCCTTGAGCTTAGTTTAGGCCTCTCTTTGGGTGGTGGGTCTTCTGGGAAGT  
CTAAGGCAAGAGATGCTTCTCTAGAGCCTAAAGCAGAACCTCAAGTGGGAAGAGAGCAGTAG  
CAAAGGCGTCTCGCAACCTCCCGATGCTCCCTTTGCGCATTACTATCAAGCAACTGCTGAGA  
ACCAGGAACACAGTAGCAAGCAGAGGCATAGCCCTGCTACCCCGCCATTTGGAACTTCTG  
GGGACAACACGGTGGCTCCTCTGCTCCAGTGGCAGATGGATCAAGTGAACATAAGCCCAC  
CAATCTCAGCTTCCCCAGTATCAGGAGGGGGCGGACTCCAATAATATTGGAAATAATTCGGA  
GGAAACATGCCAGTCTCAAGTAAACGAAAGCTGCTTTCTGAAGAGACAAGTTTTTCAGAAGA  
AGCATCATTCTGCTGCTGACCAGCCTGATGCATTAGTAAGAGCTCTGAGGGAGGTGTGAA  
AAATGCACCGATTTCAATTAGCACGGATGATGGTTCAACAGGTGAAAATGAGGATGTTGCAG  
ACTCGGAAGCAGAAGGCTCAAACCTTTGGTTGGTTGCACAGCGTGAAGACAGTGCCAAGGG  
CTCTGTGGTAAACAGAGGATCCGATATAAAGAGATCCAGTGATGCTACAGGTGGATTTTC  
AAGGAAAAGGCAACCGAGCTTTTCAGGAAGTGAATCTAGCTCTGGAAAGTTGCCGCATGG  
AAATCCCTTACAAGCATCAAATGTAGTGACTGCACAATATCAAGGCCAGACTCAGGTTTTCAG  
CACCCCTGGGCATAACTAATGCACCCAATTTTCTCCAATGTATACAGTGCAATTGAGGCCA  
CCCGTAAACAATGGACCAGCGGTCCAGACGATGGGTGGTGCCTCCCAGGTTTCTTTTGGTT  
ACCCAACAGGTCAGCTACCAATACTTGAACGAGCTCTTCATGGGCATTTGGTACTCCGCCT  
CAGGCTATTTCTTCTTTGCTGCAAAGCAAGCCGAACGAGCAGGAGCCAAACAAGCTGATG  
ATGGAAAGAAACCTCAAGAGGCTGGCGCGTCTCCTCTGCTCTTTTGGAGGATGGTAAGGT  
CGTTGAGAAGGTATTGCCTCTCATGGGCTCGGGCTCTGGTATAAGGCCGGGCATCGCCCC  
GAATGTCAAATTCGGAGGGTCCGGATCATAACCCTGATCTTCCCTGGGTATCCACAACCGGG  
TCTGGACCAAATGGCAGGACCATATCGGGCGTAACATACAACTTCGGCAGAAACGAAGTGA  
AGATCGTGTGTGCTTGCCATGGCACACACATGACGCCTGAGGAGTTCACGCGACACGCTAG  
CGTGGACGCAACAGGCCAGGAGAACAATGCTACCATGTCCGGCGTTTCTGTCTGGGAATCAA  
GCGGCCTCAGCCCAAACCTAA-3'

**Supplemental Figure 5. The coding sequence of TaNINJA from bread wheat cultivar KN199**

# Supplemental Figure 6

(a)

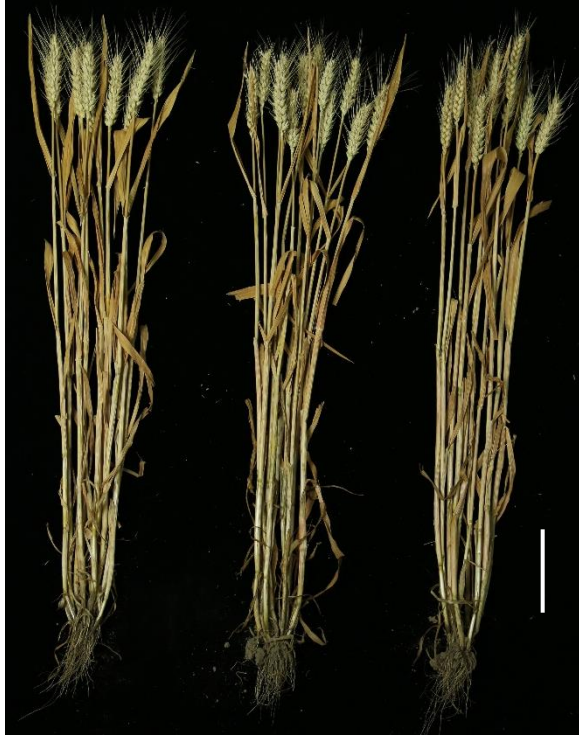

KN199

#7

#16

*pUbi:TaJAZ1ΔJas*

(b)

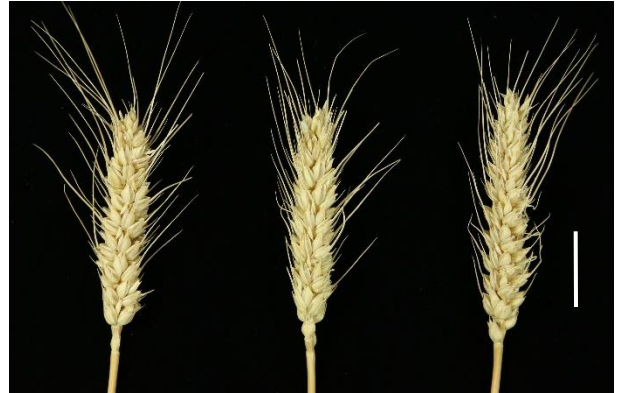

KN199

#7

#16

*pUbi:TaJAZ1ΔJas*

**Supplemental Figure 6. Overexpression of TaJAZ1ΔJas have no defects on plant growth phenotypes.**

(a) Appearance of a mature plant. Bar = 10 cm. (b) Spike morphology. Bar = 2 cm.

# Supplemental Figure 7

(a)

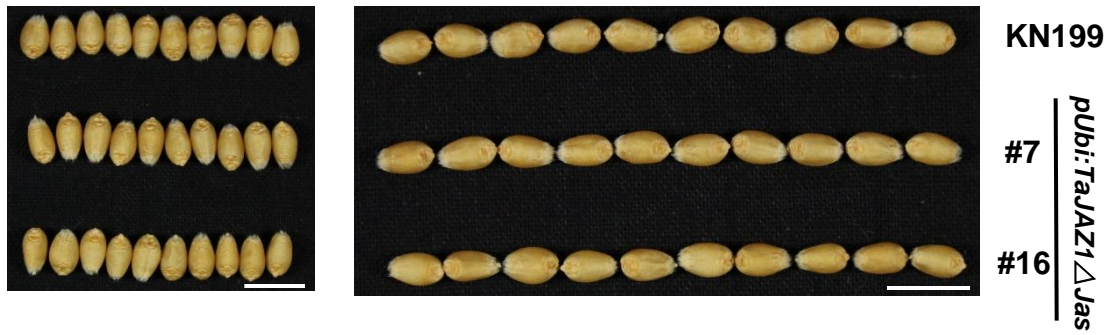

(b)

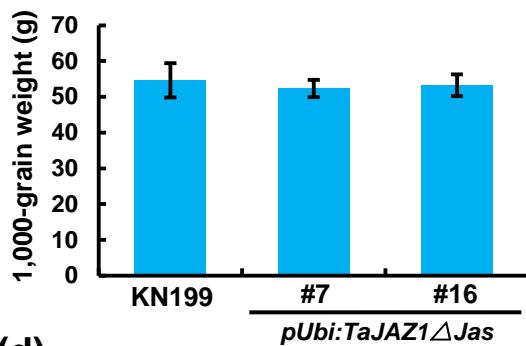

(c)

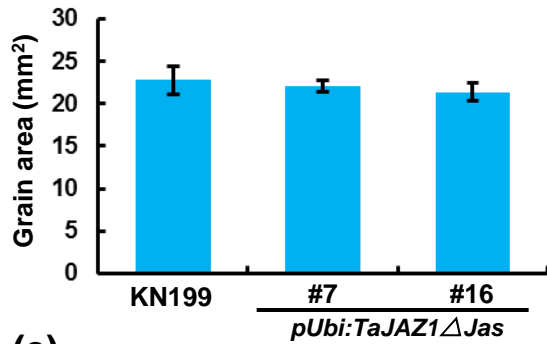

(d)

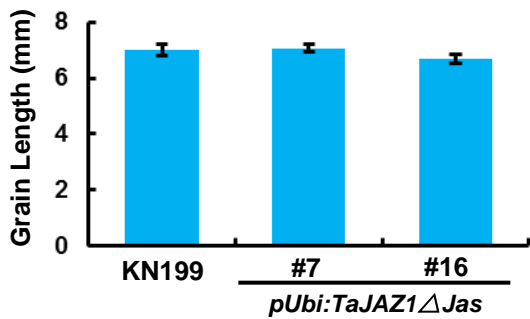

(e)

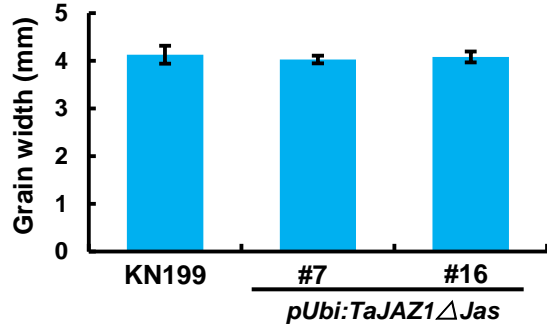

**Supplemental Figure 7. Analysis of grain size in KN199 and two *pUbi:TaJAZ1ΔJas* transgenic lines.**

(a) Appearance of the grains in KN199 and transgenic plants. Comparisons of 1000-grain weight (b), grain area (c), grain length (d), grain width (e). Error bars denote  $\pm$  SD (n = 6).

# Supplemental Table 1

**Supplemental Table 1. Constructs used in this study.**

| <b>Construct name</b>                    | <b>Vector</b>         | <b>Description</b>                                           |
|------------------------------------------|-----------------------|--------------------------------------------------------------|
| <i>pUbi:TaJAZ1<math>\Delta</math>jas</i> | <i>pUbi:cas</i>       | For gene transformation                                      |
| <i>35S:TaJAZ1-GFP</i>                    | <i>PGWB5</i>          | For subcellular localization analysis For LUC activity assay |
| <i>AD-TaJAZ1</i>                         | <i>pGADT7</i>         | For Y2H assay                                                |
| <i>BD-TaMYC4</i>                         | <i>pGBKT7</i>         | For transcriptional activity assay and Y2H assay             |
| <i>BD-TaMYC4-NT</i>                      | <i>pGBKT7</i>         | For transcriptional activity assay                           |
| <i>BD-TaMYC4-CT</i>                      | <i>pGBKT7</i>         | For transcriptional activity assay                           |
| <i>TaJAZ1pro:LUC</i>                     | <i>pGWB35</i>         | For LUC activity assay                                       |
| <i>TaMYC4-101</i>                        | <i>pEarlyGate 101</i> | For LUC activity assay                                       |
| <i>MBP-TaMYC4</i>                        | <i>pMAL-c2X</i>       | For pull down assay                                          |
| <i>GST-TaJAZ1</i>                        | <i>pGEX-4T-1</i>      | For pull down assay                                          |
| <i>nYFP-TaJAZ1</i>                       | <i>pEarly201</i>      | For BiFC assay in <i>N. benthamiana</i>                      |
| <i>cYFP-TaNINJA</i>                      | <i>pEarly202</i>      | For BiFC assay in <i>N. benthamiana</i>                      |
| <i>nLUC-TaMYC4</i>                       | <i>p1300-35S-nLUC</i> | For LCI assay in <i>N. benthamiana</i>                       |
| <i>nLUC-TaMYC4-NT</i>                    | <i>p1300-35S-cLUC</i> | For LCI assay in <i>N. benthamiana</i>                       |
| <i>nLUC-TaMYC4-CT</i>                    | <i>p1300-35S-nLUC</i> | For LCI assay in <i>N. benthamiana</i>                       |
| <i>nLUC-TaNINJA</i>                      | <i>p1300-35S-nLUC</i> | For LCI assay in <i>N. benthamiana</i>                       |
| <i>nLUC-TaNINJA-NT</i>                   | <i>p1300-35S-nLUC</i> | For LCI assay in <i>N. benthamiana</i>                       |
| <i>nLUC-TaNINJA-MD</i>                   | <i>p1300-35S-nLUC</i> | For LCI assay in <i>N. benthamiana</i>                       |
| <i>nLUC-TaNINJA-CT</i>                   | <i>p1300-35S-nLUC</i> | For LCI assay in <i>N. benthamiana</i>                       |
| <i>cLUC-TaJAZ1</i>                       | <i>p1300-35S-cLUC</i> | For LCI assay in <i>N. benthamiana</i>                       |
| <i>cLUC-TaJAZ1-NT</i>                    | <i>p1300-35S-cLUC</i> | For LCI assay in <i>N. benthamiana</i>                       |
| <i>cLUC-TaJAZ1-CT</i>                    | <i>p1300-35S-cLUC</i> | For LCI assay in <i>N. benthamiana</i>                       |



# Supplemental Table 2

## Supplemental Table 2. Primers used in this study.

| Primer name             | Sequence (5'-3')                           |
|-------------------------|--------------------------------------------|
| TaJAZ-B-F               | AGGGGAGGGGAGGGGAGGGG                       |
| TaJAZ-B/D-F             | CGAAATCCATTTATTCCCCGTC                     |
| TaJAZ-B/D-R             | CCATAGATTCAACCATGATGGCTG                   |
| TaMYC4-outer-F          | CTCCCATCCATTCCCCTTCC                       |
| TaMYC4-outer-R          | CGATCATACGGTGGTGAGTAATAGG                  |
| TaMYC4-QBV3-F           | ATGAACCTGTGGACGGACGA                       |
| TaMYC4-QBV3-R           | CCGGATTTGCATCGCGGT                         |
| TaNINJA-outer-F         | CCACCAGACTGCCTTGTGTTATAAT                  |
| TaNINJA-outer-R         | ATATGGACACAAAGGGAACATCAAG                  |
| TaNINJA-QBV3-F          | ATGGAGGATGGCCTTGAGCT                       |
| TaNINJA-QBV3-R          | GTTTTGGGCTGAGGCCGC                         |
| TaTPL-outer-F           | CAGGCTAGGTTTACGGCCAGG                      |
| TaTPL-outer-R           | CTGAGATGGATACCTTGGTTAGTG                   |
| TaTPL-F                 | ATGTCTTCTCTCAGCCGGGAGC                     |
| TaTPL-R                 | TTATCTTTCTGGTTGATCAGAACTCGA                |
| TaTPL-R(-stop)          | TCTTTCTGGTTGATCAGAACTCGA                   |
| TaJAZ1-promoter-outer-F | CACAGAGAAGAAAGCACATGCAT                    |
| TaJAZ1-promoter-outer-R | AGTCCCTCTCCATCCAGCC                        |
| TaJAZ-promoter-QBV3-F   | TACGCTAAATGCTAAGCCGCT                      |
| TaJAZ-promoter-QBV3-R   | GGAATAAATGGATTTCTGTCTCTCAC                 |
| TaJAZ-QBV3-F            | ATGGAGAGGGACTTCCTGGG                       |
| TaJAZ-QBV3-R            | GATGTGTAATTTTGTACTCGGGGAC                  |
| PUBI-BamH1-TaJAZ-F      | CGGGATCCATGGAGAGGGACTTCCTGGGC              |
| PUBI-Kpn1-TaJAZ-R       | GGGGTACCTCAAACAGCTCTTGGCATAATACTTG         |
| Real-TaJAZ1-F           | GACACGCCGAAGCCAAAGAC                       |
| Real-TaJAZ1-R           | GGCAAAGGAGGTGAAACACG                       |
| Real-TaMYC4-F           | TTTCTCAGATTTTCGCGTCCAAC                    |
| Real-TaMYC4-R           | CTCGTTGATGTAGGAGATGGCG                     |
| Real-TaNINJA-F          | CCTCAGGCTATTTCTTCCTTTGC                    |
| Real-TaNINJA-R          | GGAAGATCAGGGTATGATCCGG                     |
| nLUC-TaMYC4-F           | CACGGGGGACGAGCTCGGTACCATGAACCTGTGGACGGACGA |
| nLUC-TaMYC4-R           | ACGCGTACGAGATCTGGTACCGGATTTGCATCGCGGT      |
| TaMYC4-N-Kpn1-F         | GGGGTACCATGAACCTGTGGACGGACGA               |
| TaMYC4-N-Sal1-R         | GCGTCGACCGGCCGCTTCTCCTCC                   |
| TaMYC4-C-Kpn1-F         | GGGGTACCATGCGCAAGCGCGGG                    |
| TaMYC4-C-Sal1-R         | GCGTCGACCCGGATTTGCATCGCGG                  |
| TaJAZ1-N-Kpn1-F         | GGGGTACCATGGAGAGGGACTTCCTGGG               |
| TaJAZ1-N-Sal1-R         | GCGTCGACAGATTTTGGCACTGCGGAAT               |
| TaJAZ-C-Kpn1-F          | GGGGTACCATGTCAGGCCAGTTGGTTGTG              |
| TaJAZ-C-Sal1-R          | GCGTCGACGATGTGTAATTTTGTACTCGGGGAC          |
| nLUC-TaNINJA-F          | CACGGGGGACGAGCTCGGTACCATGGAGGATGGCCTTGAGCT |

## Supplemental Table 2. Primers used in this study.

(Continued)

| Primer name      | Sequence (5'-3')                                 |
|------------------|--------------------------------------------------|
| nLUC-TaNINJA-R   | ACGCGTACGAGATCTGGTCGACGTTTTGGGCTGAGGCCGC         |
| nLUC-TaNINJA-N-R | ACGCGTACGAGATCTGGTCGACAGCATCGGGAGGTTGCGA         |
| nLUC-TaNINJA-M-F | CACGGGGGACGAGCTCGGTACCATGCCTTTTGCGCATTACTATCAA   |
| nLUC-TaNINJA-M-R | ACGCGTACGAGATCTGGTCGACTTCGGCTTGCTTTGCAGC         |
| nLUC-TaNINJA-C-F | CACGGGGGACGAGCTCGGTACCATGCGAGCAGGAGCCAAACAAG     |
| TaJAZ1-4T-1-F    | CCGCGTGGATCCCCGGAATTCATGGAGAGGGACTTCCTGGG        |
| TaJAZ1-4T-1-R    | ATCCGGCCGCTCGABTCGACTCAGATGTGTAATTTTGTACTCGGGGAC |
| TaMYC4-MBP-F     | TTCAGAAATTCGGATCCATGAACCTGTGGACGGACGA            |
| TaMYC4-MBP-R     | TTGCCTGCAGGTGCACTTACCGGATTTGCATCGCGGT            |
| TaMYC4-N-BD-F    | ATCTCAGAGGAGGACCTGCATATGATGAACCTGTGGACGGACGA     |
| TaMYC4-N-BD-R    | AGGTCGACGGATCCCCGGGAATTCGGCCGCTTCTCCTCC          |
| TaMYC4-C-BD-F    | ATCTCAGAGGAGGACCTGCATATGATGCGCAAGCGCGGG          |
| TaMYC4-C-BD-R    | AGGTCGACGGATCCCCGGGAATTCGGATTTGCATCGCGG          |
| TaMYC4-BD-F      | ATCTCAGAGGAGGACCTGCATATGATGAACCTGTGGACGGACGA     |
| TaMYC4-BD-R      | AGGTCGACGGATCCCCGGGAATTCGGATTTGCATCGCGG          |
| TaJAZ1-AD-F      | CAGATTACGCTCATATGATGGAGAGGGACTTCCTGGG            |
| TaJAZ1-AD-R      | CACCCGGGTGGAATTCGATGTGTAATTTTGTACTCGGGGAC        |
| Real-TaPR1-F     | GAGAATGCAGACGCCCAAGC                             |
| Real-TaPR1-R     | CTGGAGCTTGCAGTCGTTGATC                           |
| Real-TaPR2-F     | AGGATGTTGCTTCCATGTTTGCCG                         |
| Real-TaPR2-R     | AAGTAGATGCGCATGCCGTTGATG                         |
| Real-TaPOX2-F    | AGGGGCTTCGGCGTCATC                               |
| Real-TaPOX2-R    | TTGGGCGTCGTCGTGTCC                               |
| Real-TaSOD-F     | CCGAGGTCTGGAACCATCAC                             |
| Real-TaSOD-R     | AGCCGAAATCCTTCTCGATCT                            |
